# Supplementary material
Source: HighWire-hosted journal article supplement (https://bmjopen.bmj.com/content/11/10/e054774)
Supplement: inline-supplementary-material-1 [file inline-supplementary-material-1.pdf]

## INDIVIDUAL INFORMATION TRANSCOV cohort

Epidemiological study to assess the impact of the transfer of COVID-19 patients  
between intensive care units

Data controller: EHESP (Ecole des Hautes Etudes en Santé Publique), represented  
by its legal representative. Contact: EHESP Director, Avenue du Professeur Léon  
Bernard, 35043 RENNES Cedex

Principal investigator: Dr Olivier GRIMAUD, METIS department (Quantitative  
methods in public health), EHESP, Avenue du Professor Léon Bernard, 35043  
RENNES Cedex. Phone 0299022552

Between mid-March and mid-April 2020, people severely affected by the COVID-19  
disease were transferred from the intensive care wards of 4 regions to 6 other French  
regions and 4 border countries. This inter-regional and international solidarity operation  
made it possible to meet the needs of an influx of patients requiring intensive care. At  
the request of the Director General of Health, EHESP is implementing the TRANSCOV  
project in order to assess the organization and the impact of these transfers on the  
health of the patients involved. The TRANSCOV project has several components,  
including an epidemiological study called the "TRANSCOV cohort", which focusses on  
the impact of transfers on health and for which you are receiving this information leaflet.  
Another specific study focusing on the psychological impact of transfers is also  
planned. You may already be or may later be invited to participate in this second study.

The EHESP is the data controller for the TRANSCOV cohort as requested by General  
Data Protection Regulation, RE 2016/679 known as "GDPR", the legal basis for  
protecting public interest. Article 9 of this regulation allows to process special  
categories of data, including health data.

In order to implement the TRANSCOV cohort, data concerning yourself will be  
collected (history, examinations, treatments, consumption of care, etc.) and  
transmitted to the EHESP or to its partners, in particular the University Hospital of  
Rennes as data manager, in a secure manner and under conditions guaranteeing their  
confidentiality. This data will come from your medical file and will concern your  
hospitalization for the COVID disease. It will also include information on the use of care  
(for example consultation with your general practitioner, prescriptions) collected by the  
health insurance for a period of one year from your hospitalization. We will collect your  
NIR (social security number) and send it to the HDH (Health Data Hub), a health data  
platform. The NIR will allow us to extract the data on treatment. This data will be made  
accessible to the EHESP on a strictly confidential basis, in order to carry out  
descriptive, comparative and economic analysis and monitoring.

Only information which is present in your medical files or from the national health data  
system will be collected, we will not contact you to complete this data. Unless you  
object, within the framework of this study, this data relating to your illness will be  
collected without showing your identity by the staff of the hospitals which have taken  
care of you and by the persons placed under their responsibility. These data will be

kept for 10 years. The staff involved in this program are due to maintain professional secrecy, in a way similar to your attending physician.

You are free to refuse to participate in this study and to end your participation at any time. In this case, you must inform the doctor of the ward which sent you the present leaflet. This decision will have no impact on your medical care.

In accordance with the provisions of the law relating to computers, files and freedoms (law of 6 January 1978 amended) and European Regulation 2016/679 of 27 April 2016, you have the right to access, rectify, delete and limit your personal data. You also have the right to object to the transmission of data. These rights can be exercised via the EHESP Data Protection Officer ([cil@ehesp.fr](mailto:cil@ehesp.fr)).

You can also directly, or through a qualified person of your choice, access all of your medical information in accordance with the provisions of Article L 1111-7 of the Public Health Code.

If you feel that your rights relating to data confidentiality have not been respected, you can submit a complaint online to the CNIL (<https://www.cnil.fr/fr/webform/adresser-une-plainte>) or by post.

### **Reuse of personal data for further research**

Without opposition from you, your data may be reused and transmitted for other research projects in the field of health. At any time, you can object to this reuse by contacting the doctor of the establishment who sent you this leaflet or the Data Protection Officer.

The EHESP website (<https://www.ehesp.fr>) will detail, for each project concerned, the identity of the data controller and the purposes pursued justifying the reuse of your data.

This web page is a means for you to stay informed about current projects which possibly involve the reuse of some of your health data. With this information, you can choose to exercise your rights of access, rectification, limitation, opposition or erasure of your data. The display of projects on the website page constitutes information for this reuse of data and therefore, it is not planned to send you an individual letter of additional information for each research project

For any questions or additional information concerning this research project as well as for any requests or complaints concerning the recording of your data in the study database, we invite you to contact the doctor of the department who sent you this leaflet.
